# Supplementary material
Source: PubMed Central journal article supplement (PMC2756356)
Supplement: mmc1.pdf [file mmc1.pdf]

Biophysical Journal, Volume 97

**Supporting Material**

**RYANODINE RECEPTOR LUMINAL Ca<sup>2+</sup> REGULATION: SWAPPING  
CALSEQUESTRIN AND CHANNEL ISOFORMS**

Jia Qin, Giorgia Valle, Alma Nani, Haiyan Chen, Josefina Ramos-Franco, Alessandra Nori, Pompeo Volpe, and Michael Fill

### Supplemental Figure:

Absence of a detectable action of CSQ1 on single RyR1 channel  $P_o$  in quasi-physiological salt solutions. In this experiment, the cytosolic solution contained 5 mM ATP, 1 mM  $Mg^{2+}$  (free) and 20  $\mu M$   $Ca^{2+}$  (free). The luminal solution contained 100 mM Cs-methanesulfonate, 1 mM  $Mg^{2+}$  and 1 mM (or 8  $\mu M$ )  $Ca^{2+}$ . Unit current at 0 mV was small and difficult to resolve. Thus, all recordings here were done at a holding potential of 20 mV. Open events are shown as upward deflections. All recordings shown are from the same channel (except that in part E). **A.** Example recordings when no CSQ1 was present and the luminal free  $Ca^{2+}$  concentration ( $Ca_L$ ) was 1 mM. **B.** Example recordings after 5  $\mu g/ml$  CSQ1 was added to the luminal solution ( $Ca_L = 1$  mM). **C.** Example recordings with 5  $\mu g/ml$  CSQ1 present but now with a  $Ca_L$  of 8  $\mu M$ . **D.** The summary  $P_o$  presented in this plot was obtained from 4 minute recordings on 3-4 different RyR1 channels. There was no significant  $P_o$  difference detected when no CSQ1 was present with 1 mM  $Ca_L$ , when CSQ1 was present with 1 mM  $Ca_L$  or when CSQ1 was present with 8  $\mu M$   $Ca_L$ . The average ( $\pm$ SEM)  $P_o$ 's were  $0.42 \pm 0.10$ ,  $0.43 \pm 0.13$  &  $0.39 \pm 0.09$ , respectively. **E.** Example recordings taken after 10  $\mu M$  ryanodine was added to the cytosolic solution. The luminal solution contained 5  $\mu g/ml$  CSQ1 and a  $Ca_L$  of 8  $\mu M$ . Ryanodine modified the channel into the characteristic long-lived sub-conductance state confirming the channels examined here were indeed RyR channels.

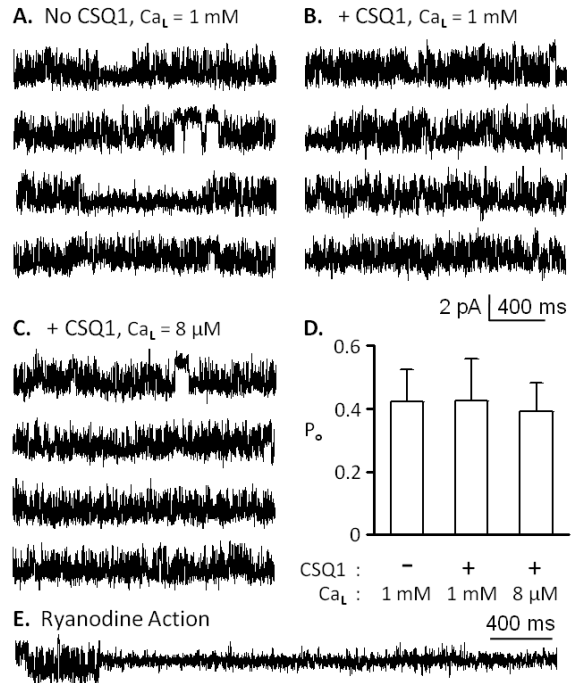

### Supplemental Methods:

**Chemicals and Drugs.** BAPTA (1,2-Bis(2-aminophenoxy)ethane-N,N,N',N'-tetraacetic acid), 5,5'-Dibromo-BAPTA (1,2-Bis(2-amino-5-bromophenoxy)ethane-N,N,N',N'-tetraacetic acid),  $Ca(OH)_2$ , CsCl, HEPES (4-(2-Hydroxyethyl)piperazine-1-ethanesulfonic acid) were obtained from Fluka (Milwaukee, WI).  $CaCl_2$  standard for calibration was from World Precision Instruments Inc (Sarasota, FL). Phospholipids were obtained from Avanti Polar Lipids (Alabaster, Alabama). Decane and all other chemicals were obtained from Aldrich Chemical (Milwaukee, WI).

**Statistics.** Summary unpaired single channel results are presented as mean  $\pm$  SEM of  $n$  determinations. Statistical comparisons between means were performed using a Student's  $T$  test with significance defined at the  $p < 0.05$  level. To statistically define bursts, the classic PS method was applied (39). The PS method finds bursts by scanning the recording for closely spaced events. It then adds or subtracts neighboring events if they occur within  $\leq$  half but not  $\geq$  twice the mean inter-event interval. This method essentially measures the "surprise" of an event occurring when it does assuming that gating is random. Generally, PS values  $> 10$  are considered to be highly significant.
